# Supplementary material for: A chemically treated IGZO-based highly visible-blind UV phototransistor with suppression of the persistent photoconductivity effect
Source: Royal Society of Chemistry journal article supplement (doi:10.1039/d3tc02756b), 2023-01-01
Supplement: d3tc02756b2.pdf [file d3tc02756b2.pdf]

## Supporting Information

### Chemically Treated IGZO-based Highly Visible-Blind UV Phototransistor with Suppression of Persistent Photoconductivity Effect

*Min Gye Kim,<sup>a,b</sup> Jun Hyung Jeong,<sup>a,b</sup> Jin Hyun Ma,<sup>a,b</sup> Min Ho Park,<sup>a,b</sup> Seunghwan Kim,<sup>c</sup>  
Soohyung Park,<sup>c,d</sup> and Seong Jun Kang<sup>a,b,\*</sup>*

<sup>a</sup>Department of Advanced Materials Engineering for Information and Electronics, Kyung Hee University, Yongin 17104, Republic of Korea

<sup>b</sup>Integrated Education Institute for Frontier Science & Technology (BK21 Four), Kyung Hee University, Yongin 17104, Republic of Korea

<sup>c</sup>Advanced Analysis Center, Korea Institute of Science and Technology (KIST), Seoul 02792, Republic of Korea

<sup>d</sup>Division of Nano & Information Technology, KIST School, University of Science and Technology (UST), Seoul 02792, Republic of Korea

\*Corresponding author: Tel: +82-31-201-3324

E-mail: junkang@khu.ac.kr (S. J. Kang)

## Index

**Figure S1.** (a) XRD analysis of pristine IGZO and 2EEG-IGZO with a specific volume ratio of 8:1:2 and (b) FFT image of 2EEG-IGZO with 8:1:1 vol%.

**Figure S2.** Transfer curves (left) and SQRT drain current ( $I_D$ ) curves (right, blue) versus  $V_G$  for (a) IGZO, (b-d) 2EEG-IGZO with volume ratios of 8:1:1, 8:1:2, and 8:1:4 vol%, respectively.

**Figure S3.** Optical bandgap energy of (a) IGZO, (b-e) 2EEG-IGZO samples with various volume ratio of 2-EE and EG (8:1:1, 8:1:2, 8:1:4, 8:1:8 vol%) calculated by Tauc plot method.

**Figure S4.** XPS O 1s spectra of bare IGZO sample.

**Figure S5.** XPS spectra of (a) In 3d, (b) Ga 2p, (c) Zn 2p for IGZO, 2EEG-IGZO samples (8:1:1, 8:1:2, 8:1:4, 8:1:8 vol%).

**Figure S6.** Transfer characteristics under NBS ( $V_G = -20$  V) of (a) pristine IGZO and 2EEG-IGZOs with different volume ratios of (b) 8:1:1, (c) 8:1:2, (d) 8:1:4, and (e) 8:1:8, respectively. (f)  $V_{th}$  shift with stress time under NBS condition.

**Figure S7.** Transfer curves under NBIS ( $V_G = -20$  V) of (a) pristine IGZO and 2EEG-IGZOs with different volume ratios of (b) 8:1:1, (c) 8:1:2, (d) 8:1:4, and (e) 8:1:8, respectively. (f)  $V_{th}$  shift with various stress time under NBIS condition.

**Figure S8.** XPS N 1s spectra of bare IGZO sample.

**Figure S9.** XPS C 1s spectra of (a) IGZO, 2EEG-IGZO samples with volume ratios of 8:1:1, 8:1:2, 8:1:4, 8:1:8 vol%, and (b) the four deconvoluted C 1s peak of IGZO.

**Figure S10.** Urbach energy plots of the IGZO, 2EEG-IGZO samples with different additive volume ratio of 8:1:1, 8:1:2, 8:1:4, and 8:1:8 vol%, respectively.

**Figure S11.** Photosensitivities of pristine IGZO and 2EEG-IGZO samples with varying vol% ratios (8:1:1, 8:1:2, 8:1:4, and 8:1:8) as a function of  $V_G$ , measured under red, green, blue, and UV light.

**Figure S12.** Contact angle measurements of IGZO and 2EEG-IGZO with various composition ratios (8:1: $x$ ).

**Figure S13.** XPS C 1s spectra of 2EEG-IGZO samples (8:1:1 vol% ratio) without UVO treatment and with UVO treatment durations of 1 min, 2 min, and 3 min, respectively.

**Figure S14.** Contact angle measurements of 2EEG-IGZO (8:1:1 vol%) with different UVO treatment duration of 1 min, 2 min, and 3 min, respectively.

**Figure S15.** Optical bandgap energy of 2EEG-IGZO (8:1:1 vol% ratio) with varying UVO treatment durations: (a) 1 min, (b) 2 min, and (c) 3 min, respectively.

**Figure S16.** Photosensitivity of 2EEG-IGZO phototransistors under red (635 nm) and green (520 nm) illumination as a function of UVO treatment time.

**Figure S17.** Photoresponse characteristics of 2EEG-IGZO phototransistors under red (635 nm) and green (520 nm) illumination as a function of UVO treatment time: (a) before (left) and after 1 min. UVO treatment (right), and (b) before (left) and after UVO treatment with a duration of 2 min.

**Figure S18.** Transfer characteristics of 2EEG-IGZO (8:1:1) under NBS condition with different UVO treatment duration of (a) 1 min, (b) 2 min, and (c) 3 min, and under NBIS condition with (d) 1 min, (e) 2 min, and (f) 3 min of UVO treatment durations, respectively. ( $V_G = -20V$ )

**Figure S19.** (a) Temporal photoresponse of 2EEG-IGZO (8:1:1 vol%) as a function of UVO treatment duration (0, 1, 2, 3 min) and (b)-(e) the corresponding rising/falling times of each sample. ( $V_G = -15V$ ,  $V_D = 0.1 V$ )

**Figure S20.** A real outdoor experiment image to clarify the potential of optimized 2EEG-IGZO TFTs as a real UV sensor.

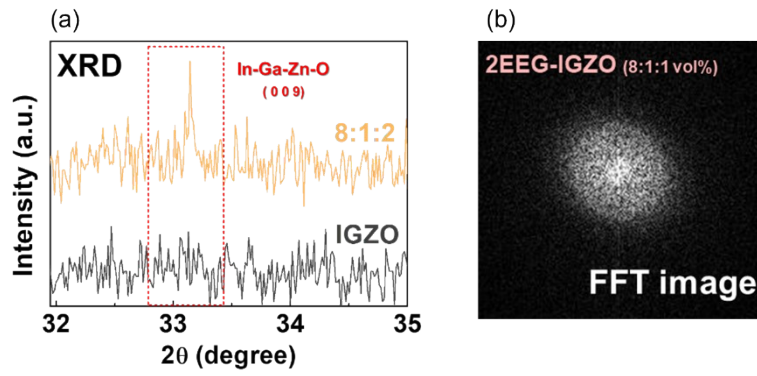

**Figure S1.** (a) XRD analysis of pristine IGZO and 2EEG-IGZO with a specific volume ratio of 8:1:2 and (b) FFT image of 2EEG-IGZO with 8:1:1 vol%.

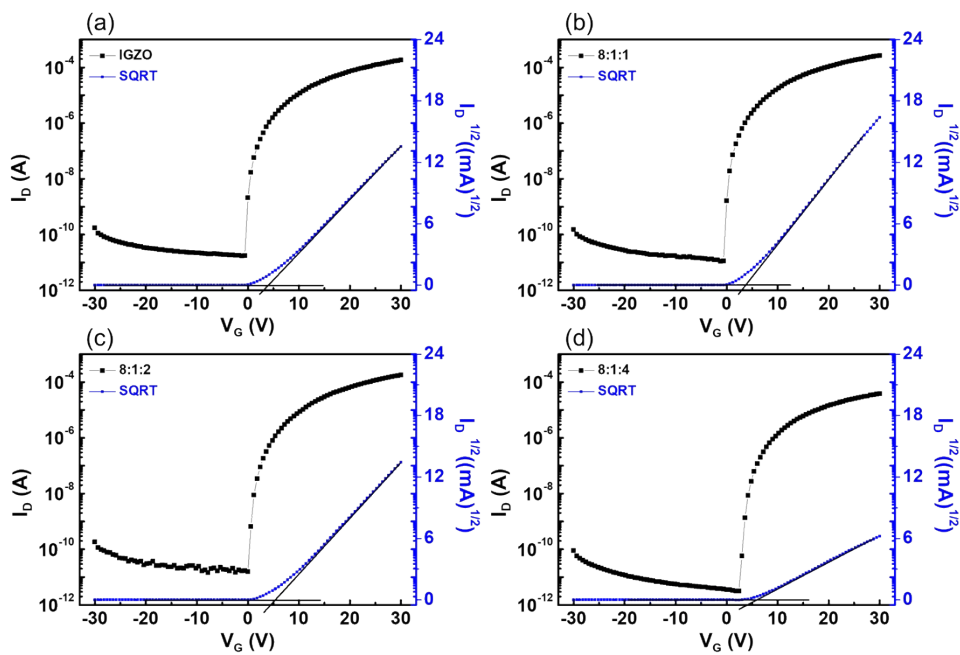

**Figure S2.** Transfer curves (left) and SQRT drain current ( $I_D$ ) curves (right, blue) versus  $V_G$  for (a) IGZO, (b-d) 2EEG-IGZO with volume ratios of 8:1:1, 8:1:2, and 8:1:4 vol%, respectively.

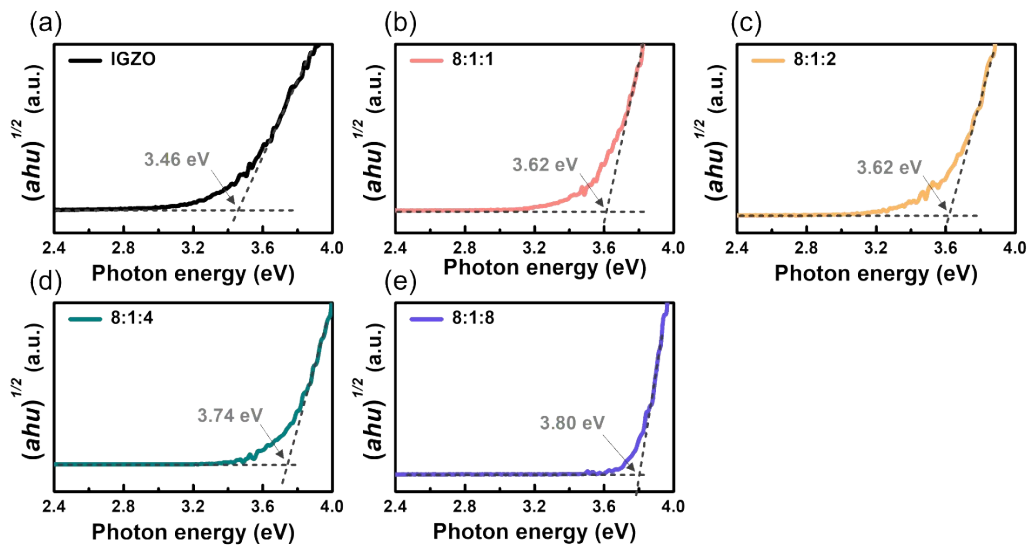

**Figure S3.** Optical bandgap energy of (a) IGZO, (b-e) 2EEG-IGZO samples with various volume ratio of 2-EE and EG (8:1:1, 8:1:2, 8:1:4, 8:1:8 vol%) calculated by Tauc plot method.

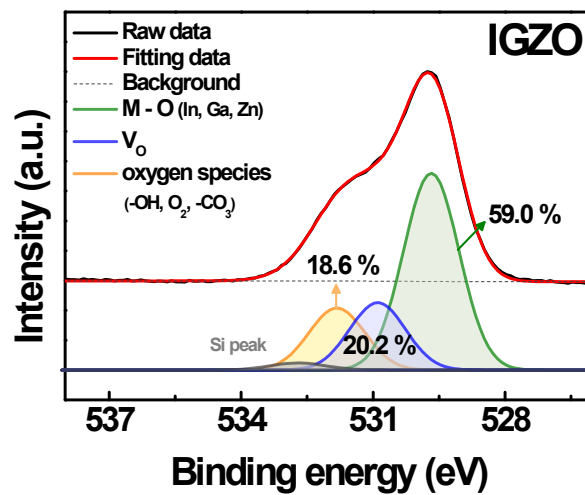

**Figure S4.** XPS O 1s spectra of bare IGZO sample.

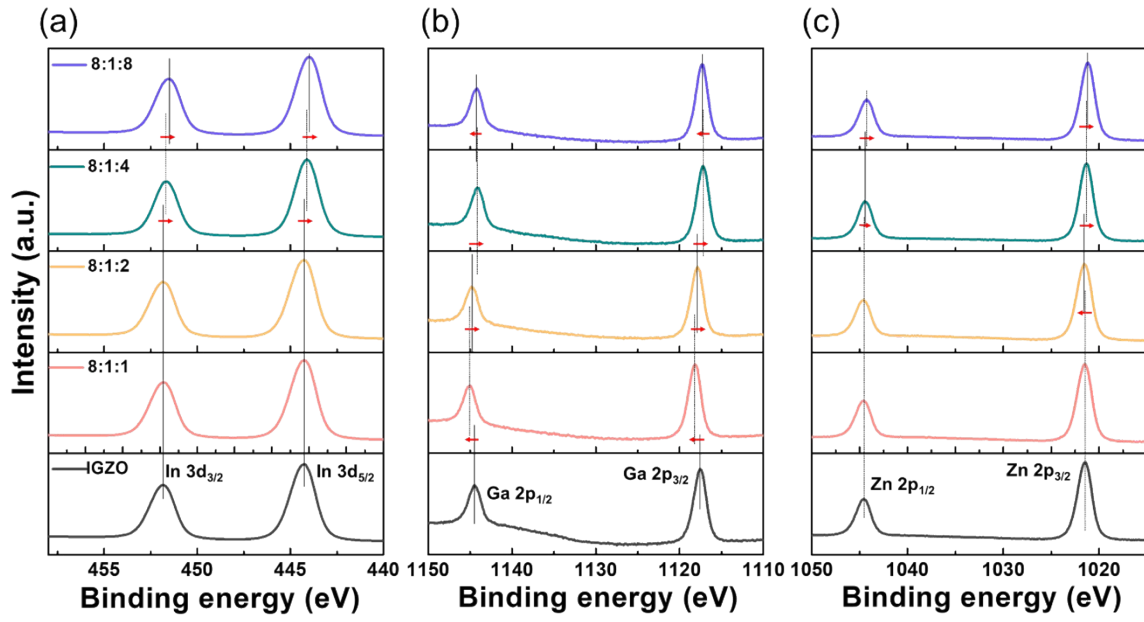

**Figure S5.** XPS spectra of (a) In 3d, (b) Ga 2p, (c) Zn 2p for IGZO, 2EEG-IGZO samples (8:1:1, 8:1:2, 8:1:4, 8:1:8 vol%).

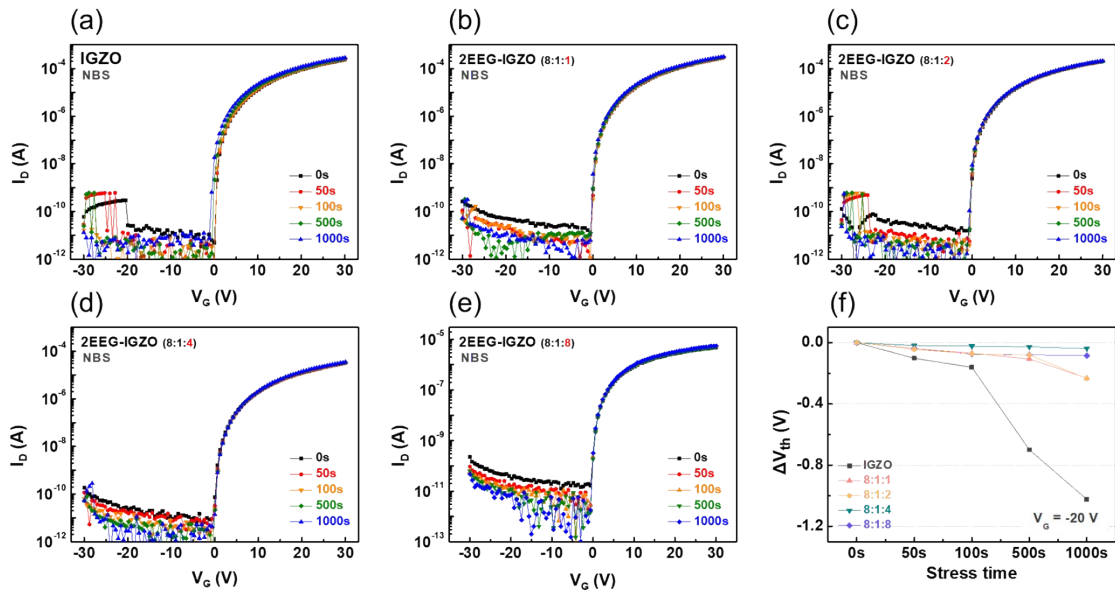

**Figure S6.** Transfer characteristics under NBS ( $V_G = -20$  V) of (a) pristine IGZO and 2EEG-IGZOs with different volume ratios of (b) 8:1:1, (c) 8:1:2, (d) 8:1:4, and (e) 8:1:8, respectively. (f)  $V_{th}$  shift with varying stress time under NBS condition.

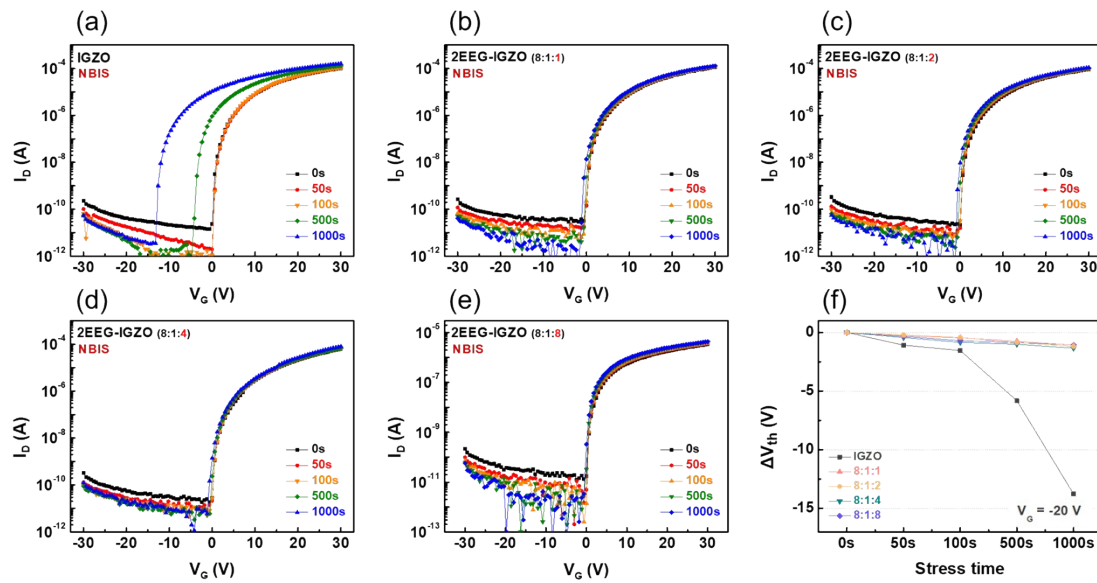

**Figure S7.** Transfer curves under NBIS ( $V_G = -20$  V) of (a) pristine IGZO and 2EEG-IGZOs with different volume ratios of (b) 8:1:1, (c) 8:1:2, (d) 8:1:4, and (e) 8:1:8, respectively. (f)

$V_{th}$  shift with various stress time under NBIS condition.

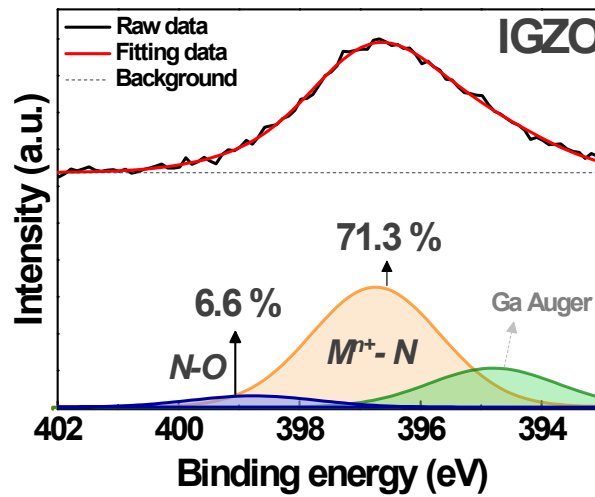

**Figure S8.** XPS N 1s spectra of bare IGZO sample.



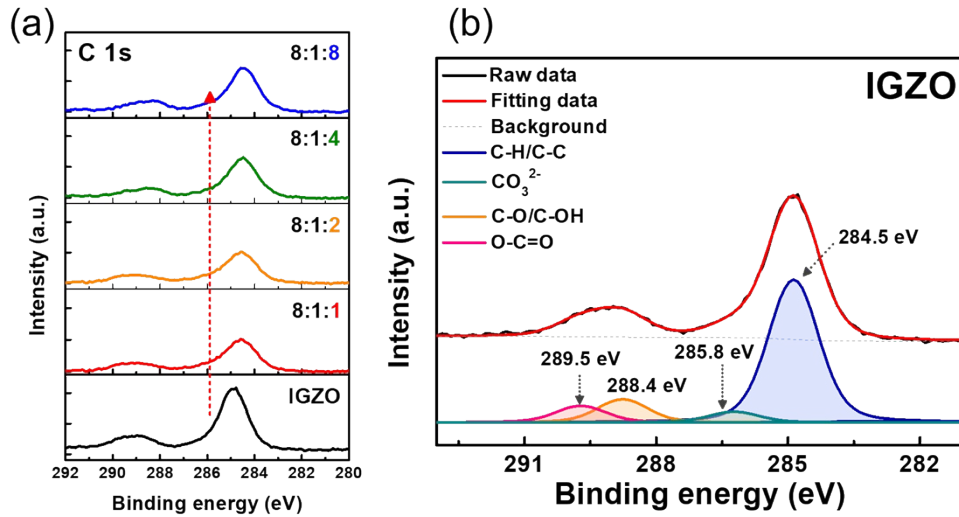

**Figure S9.** XPS C 1s spectra of (a) IGZO, 2EEG-IGZO samples with volume ratios of 8:1:1, 8:1:2, 8:1:4, 8:1:8 vol%, and (b) the four deconvoluted C 1s peak of IGZO.

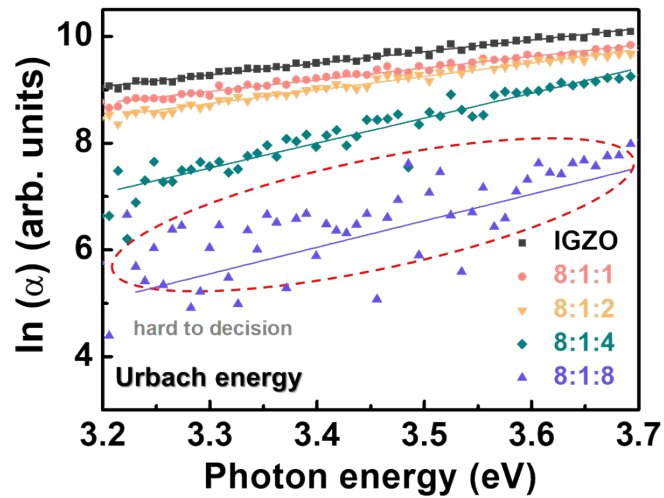

**Figure S10.** Urbach energy plots of the IGZO, 2EEG-IGZO samples with different additive volume ratio of 8:1:1, 8:1:2, 8:1:4, and 8:1:8 vol%, respectively.

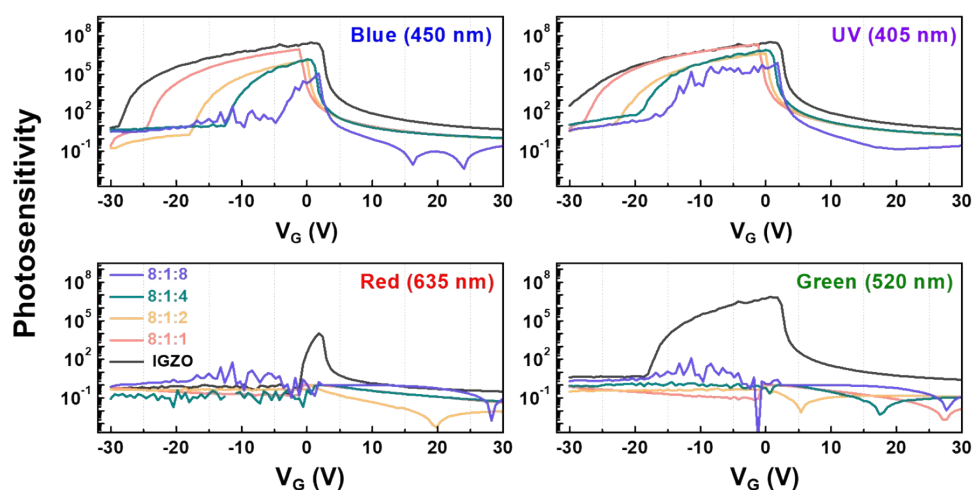

**Figure S11.** Photosensitivities of pristine IGZO and 2EEG-IGZO samples with varying vol% ratios (8:1:1, 8:1:2, 8:1:4, and 8:1:8) as a function of  $V_G$ , measured under red, green, blue, and UV light.

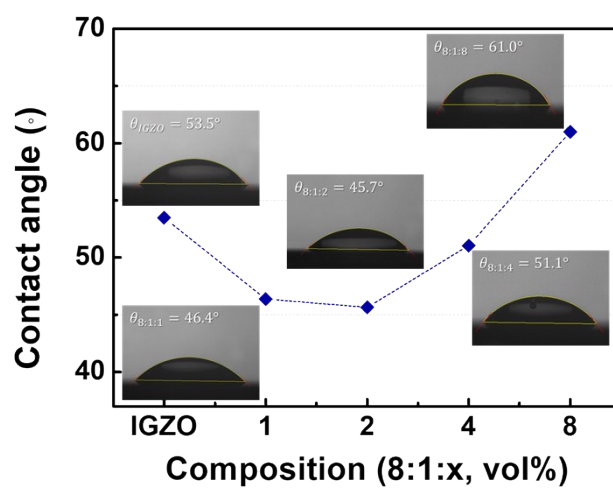

**Figure S12.** Contact angle measurements of IGZO and 2EEG-IGZO with various composition ratios (8:1: $x$ ).

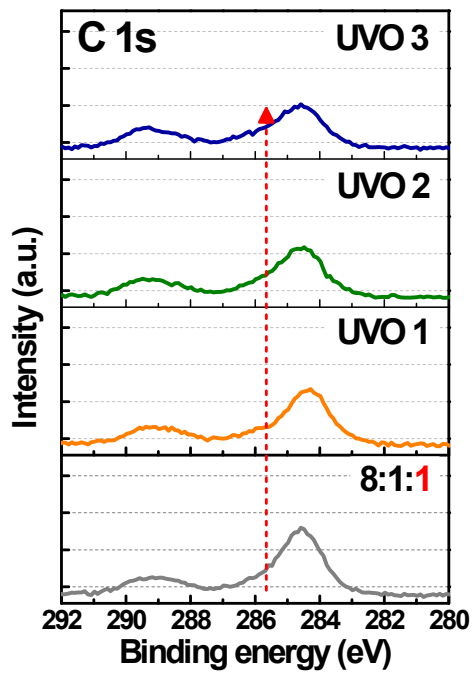

**Figure S13.** XPS C 1s spectra of 2EEG-IGZO samples (8:1:1 vol% ratio) without UVO treatment and with UVO treatment durations of 1 min, 2 min, and 3 min, respectively.

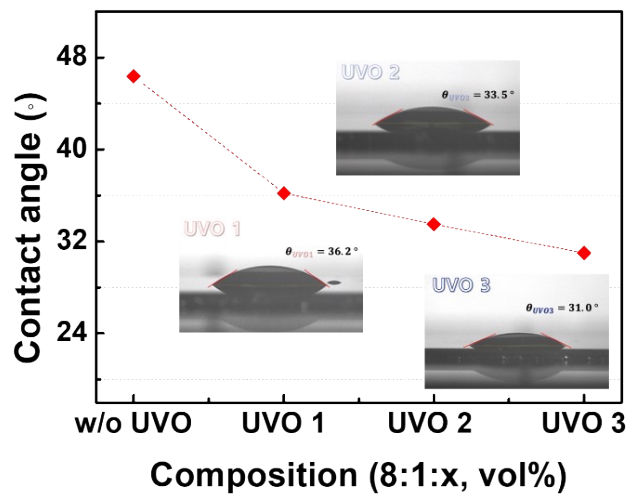

**Figure S14.** Contact angle measurements of 2EEG-IGZO (8:1:1 vol%) with different UVO treatment duration of 1 min, 2 min, and 3 min, respectively.

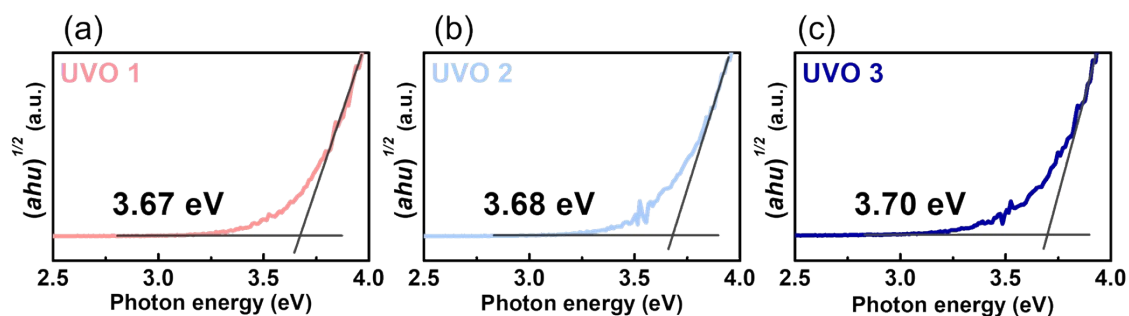

**Figure S15.** Optical bandgap energy of 2EEG-IGZO (8:1:1 vol% ratio) with varying UVO treatment durations: (a) 1 min, (b) 2 min, and (c) 3 min, respectively.

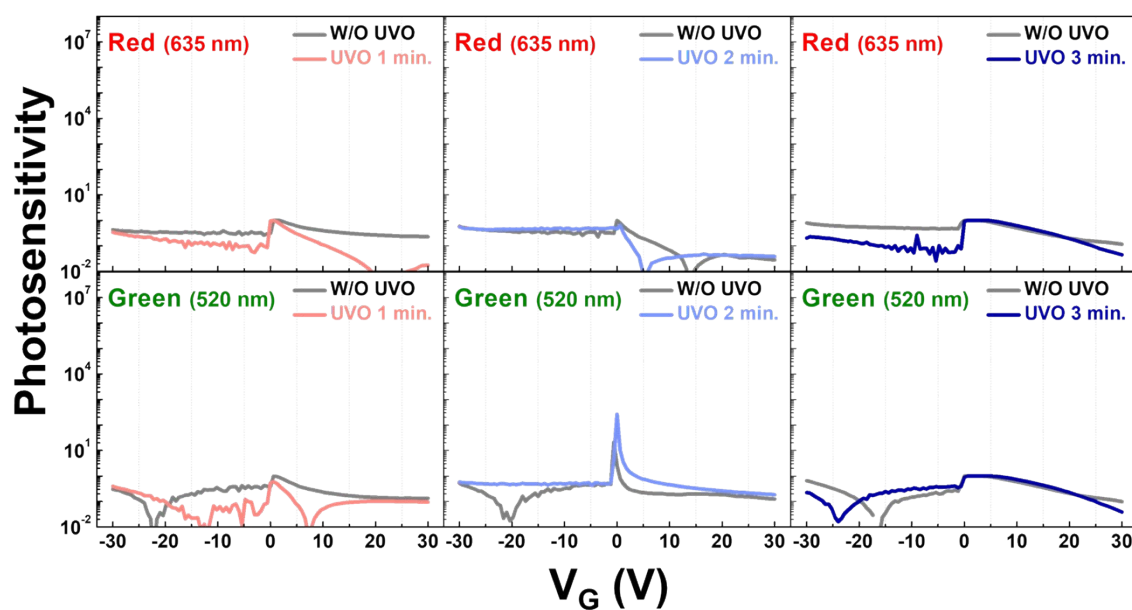

**Figure S16.** Photosensitivity of 2EEG-IGZO phototransistors under red (635 nm) and green (520 nm) illumination as a function of UVO treatment time.

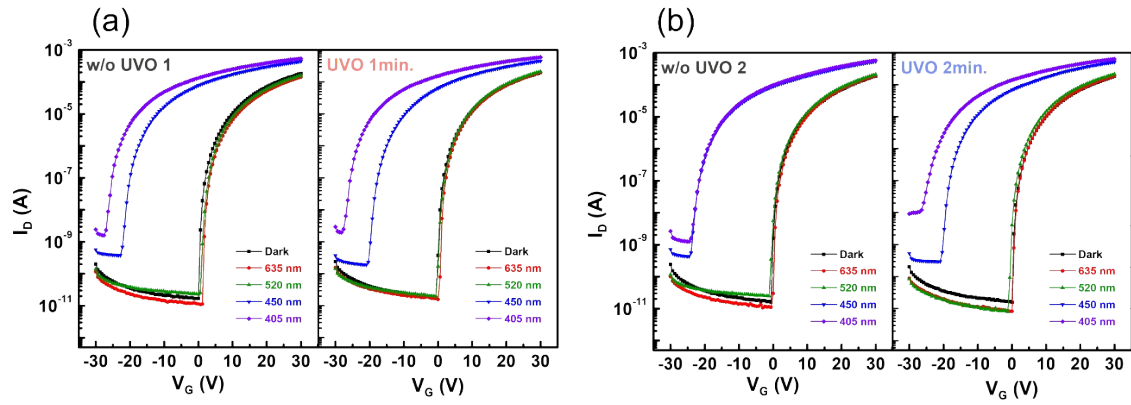

**Figure S17.** Photoreponse characteristics of 2EEG-IGZO phototransistors under red (635 nm) and green (520 nm) illumination as a function of UVO treatment time: (a) before (left) and after 1 min. UVO treatment (right), and (b) before (left) and after UVO treatment with a duration of 2 min.

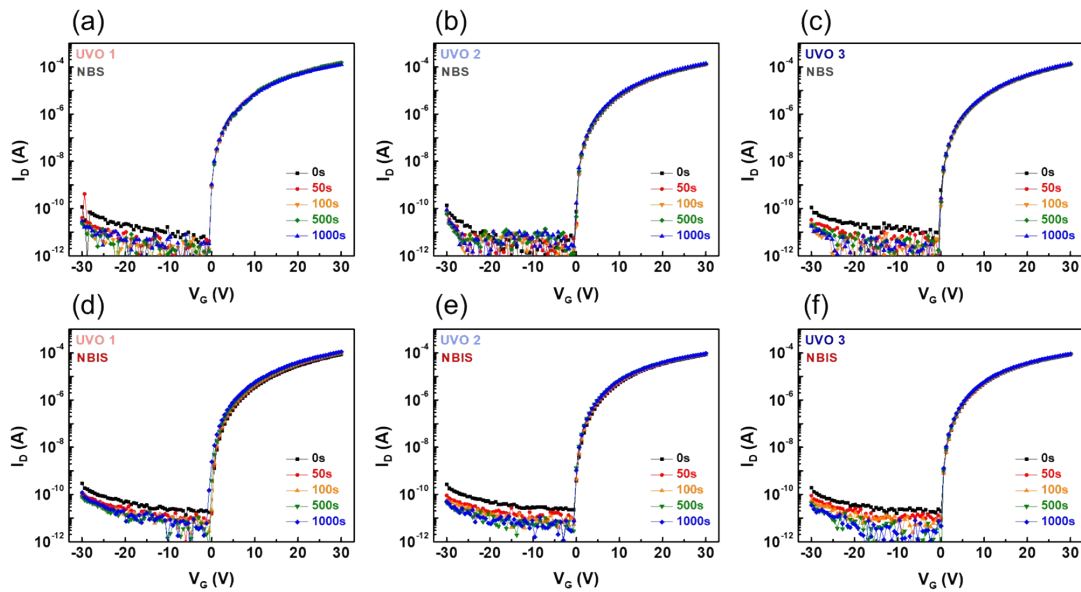

**Figure**

**S18.** Transfer characteristics of 2EEG-IGZO (8:1:1) under NBS condition with different UVO treatment duration of (a) 1 min, (b) 2 min, and (c) 3 min, and under NBIS condition with (d) 1 min, (e) 2 min, and (f) 3 min of UVO treatment durations, respectively. ( $V_G = -20V$ )

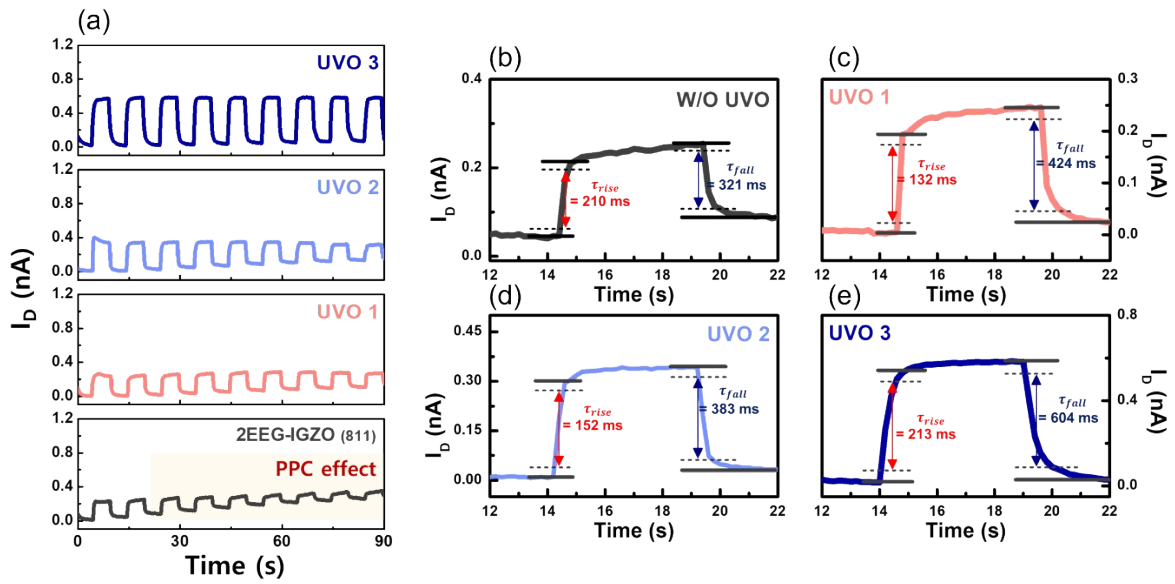

**Figure S19.** (a) Temporal photoresponse of 2EEG-IGZO (8:1:1 vol%) as a function of UVO treatment duration (0, 1, 2, 3 min) and (b)-(e) the corresponding rising/falling times of each sample. ( $V_G = -15V$ ,  $V_D = 0.1 V$ )

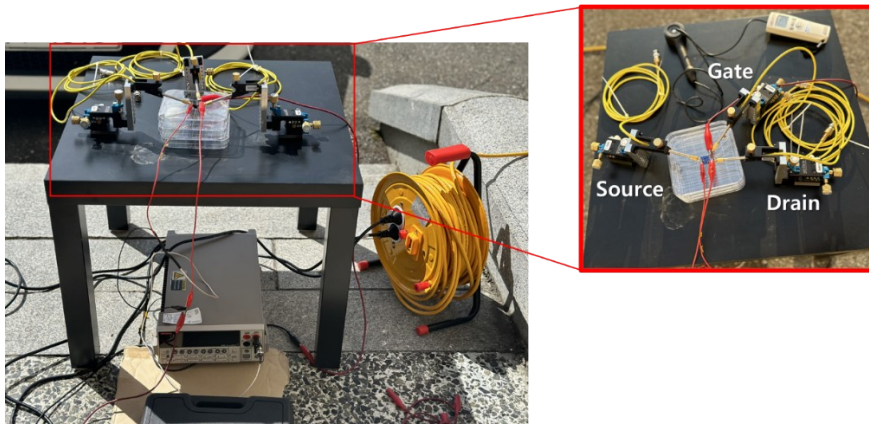

**Figure S20.** A real outdoor experiment image to clarify the potential of optimized 2EEG-IGZO TFTs as a real UV sensor.
